# Supplementary material
Source: publisher figshare collection journal article supplement (https://acs.figshare.com/ndownloader/files/4922770)
Supplement: Supplementary file 1 [file 4922770]

## **Supporting Information**

### **Colloidal Solution Combustion Synthesis: Toward Mass Production of a Crystalline Uniform Mesoporous CeO<sub>2</sub> Catalyst with Tunable Porosity**

Albert A. Voskanyan, Kwong-Yu Chan\*, Chi-Ying Vanessa Li

Department of Chemistry, The University of Hong Kong, Pokfulam Road,  
Hong Kong.

\*Email: [hrccky@hku.hk](mailto:hrccky@hku.hk)

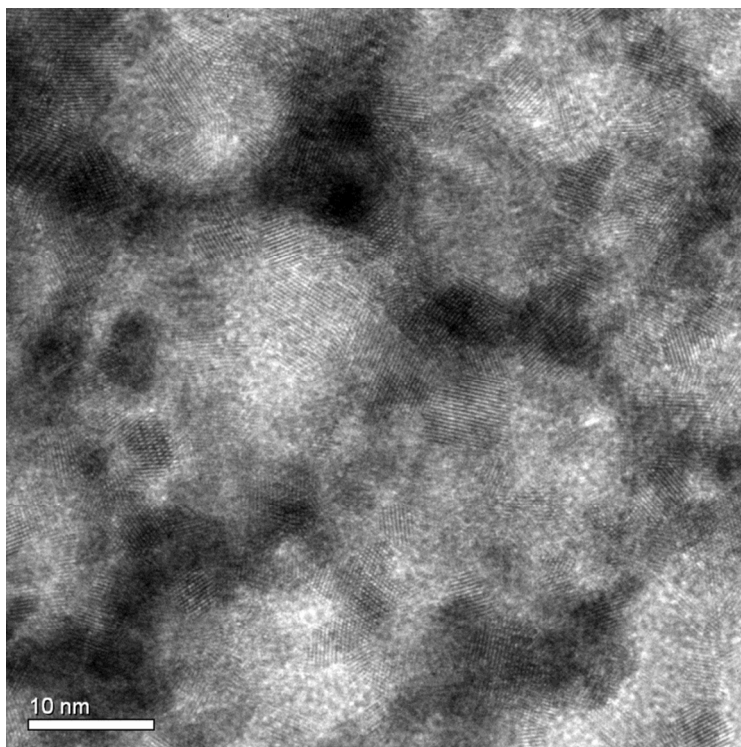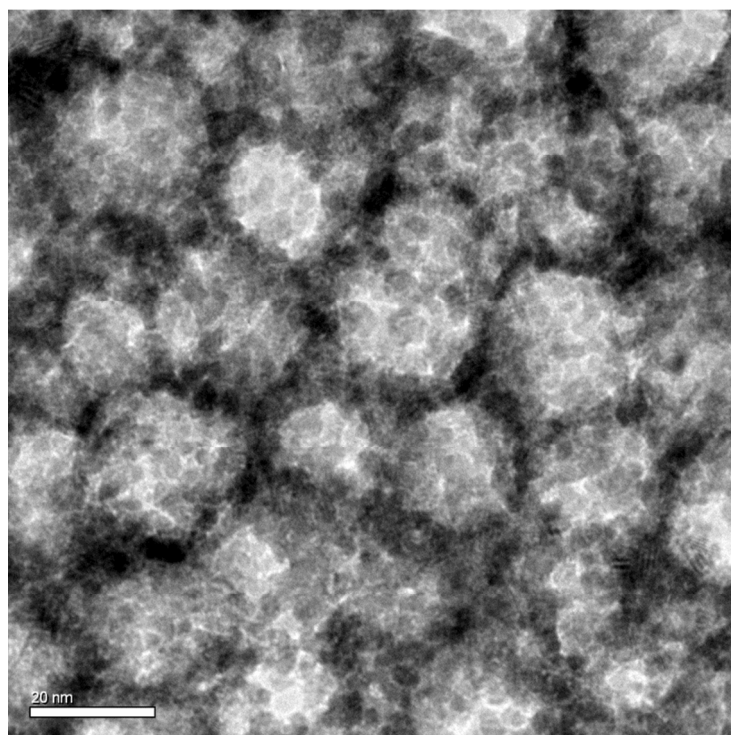

**Figure S1.** TEM images of ceria-3 sample at different magnifications.

**(A)**

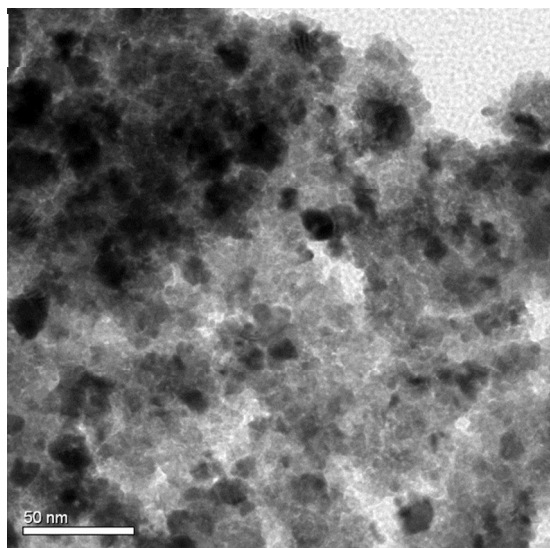

**(B)**

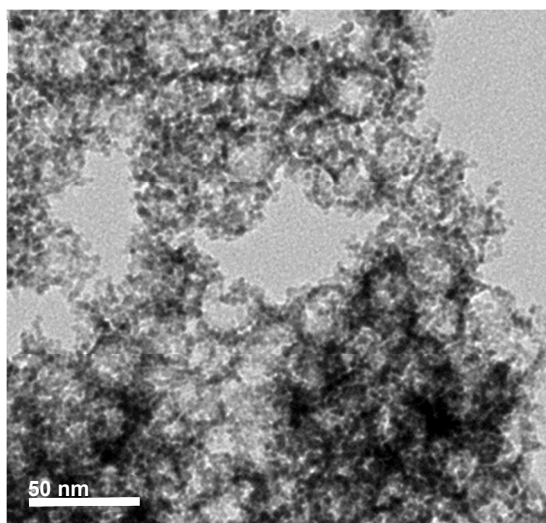

**(C)**

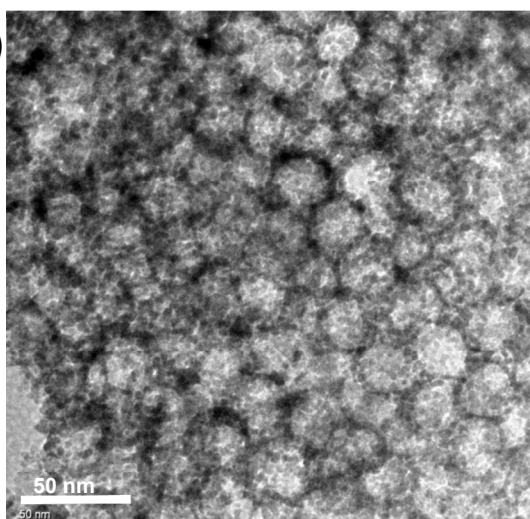

**Figure S2.** TEM images of (A) ceria-0, (B) ceria-1, (c) ceria-2 samples.

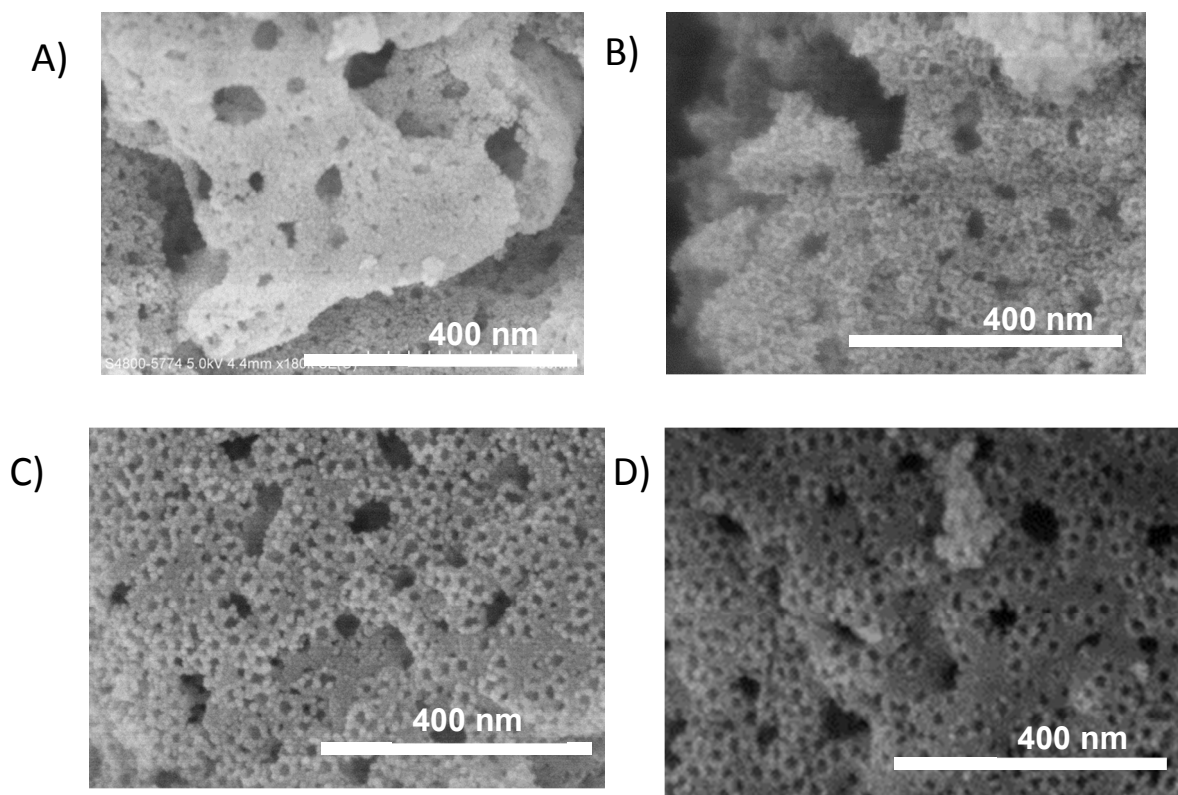

**Figure S3.** SEM images of different CeO<sub>2</sub> samples (A) ceria-0, (B) ceria-1, (C) ceria-2, and (D) ceria-3.

#### Porosity calculation

$$m(\text{CeO}_2) = \rho_{\text{CeO}_2} (V_{\text{CeO}_2} - V_p) \quad V_p = 0.6 \text{ ml} \quad \rho(\text{CeO}_2) [\text{ref.1}] = 7.28 \text{ g ml}^{-1}$$

After solving equation for 1 g of CeO<sub>2</sub>  $V_{\text{CeO}_2} = 0.74 \text{ ml}$

$$\text{Porosity} = \frac{V_p}{V_{\text{CeO}_2}} \times 100\% = 81\%$$

In CeO<sub>2</sub> Ce<sup>4+</sup> is surrounded by eight O<sup>2-</sup> ions. Formation of the oxygen vacancies and the accompanying Ce<sup>3+</sup> reduces the coordination number of cerium from eight to seven causing the change in the Ce-O bond length and overall lattice constant. Also Ce<sup>3+</sup> has a higher ionic radius (1.034 Å) compared to the Ce<sup>4+</sup> (0.92 Å).

Figure S4 compares the Ce 3d core-level of three samples. Distinct photopeaks of CeO<sub>2</sub> are identified in the XPS spectra and labeled in accordance with the literature. The V and U labels refer to the 3d<sub>5/2</sub> (Ce<sup>3+</sup>) and 3d<sub>3/2</sub> (Ce<sup>4+</sup>) spin-orbit split components, respectively. The main peaks of V''' and U''' represented the 3d<sup>10</sup> 4f<sup>0</sup> initial electronic state corresponding to the Ce<sup>4+</sup> cation whereas the peak of V' represented the 3d<sup>10</sup> 4f<sup>1</sup> initial electronic state of corresponding to the Ce<sup>3+</sup> cation. The relative concentration of Ce<sup>3+</sup> was calculated as[ref.2,3]:

$$(\text{Ce}^{3+}) = \frac{A_{v0} + A_{vI} + A_{u0} + A_{uI}}{A_{v0} + A_{vI} + A_{u0} + A_{uI} + A_{v'} + A_{u'} + A_{v''} + A_{u''} + A_{v'''} + A_{u'''} + A_{v''''} + A_{u''''}}$$

where  $A_i$  is the integrated area of peak  $i$ .

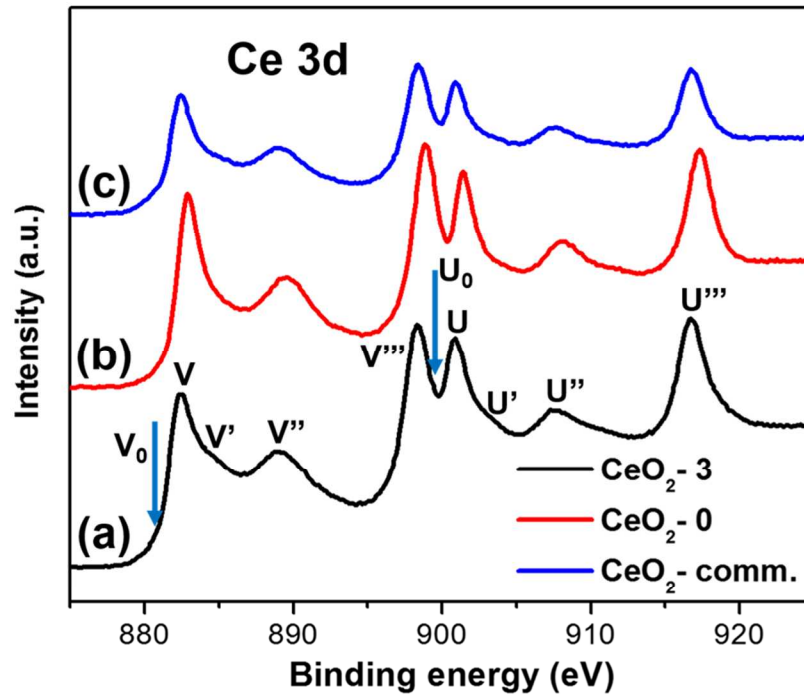

**Figure S4.** XPS of Ce 3d core level of different CeO<sub>2</sub> samples.

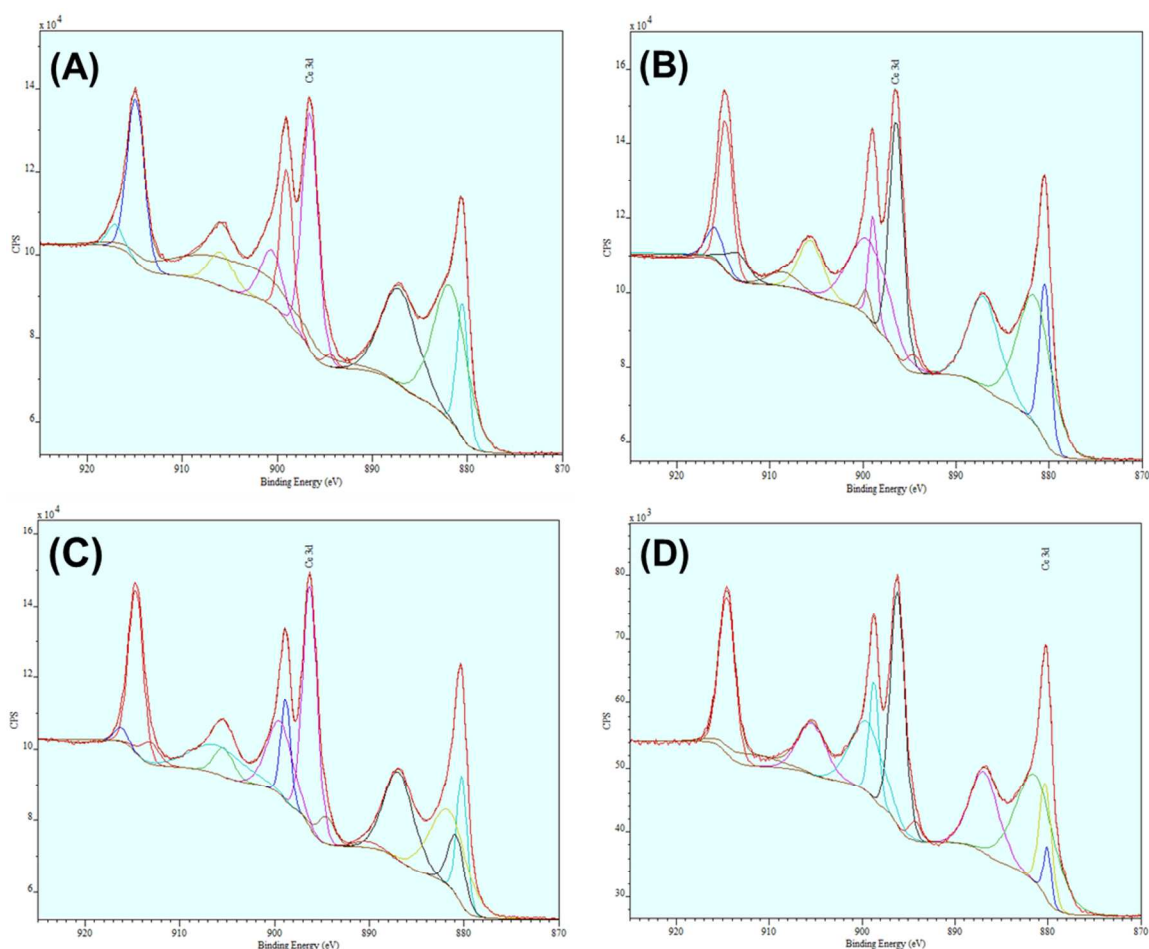

**Figure S5.** De-convoluted Ce 3d core level peaks of different CeO<sub>2</sub> samples (A) ceria-3, (B) ceria-2, (C) ceria-0, (D) ceria-comm.

To better understand the surface structure the O 1s peak is also analyzed for all samples (Figure S10). The O 1s peaks could be fitted into two peaks referred to as the lattice oxygen O<sup>2-</sup> and the chemisorbed OH<sup>-</sup> groups. The results in Table S2 also show that the concentration of adsorbed OH<sup>-</sup> is the highest on the CeO<sub>2</sub>-3 surface compared to other ceria samples. Emphatically, there is an additional third peak in O 1s region ascribed to the adsorbed H<sub>2</sub>O molecules. The presence of the third peak can be due to the small particle size and high specific surface area leading to surface hydration.

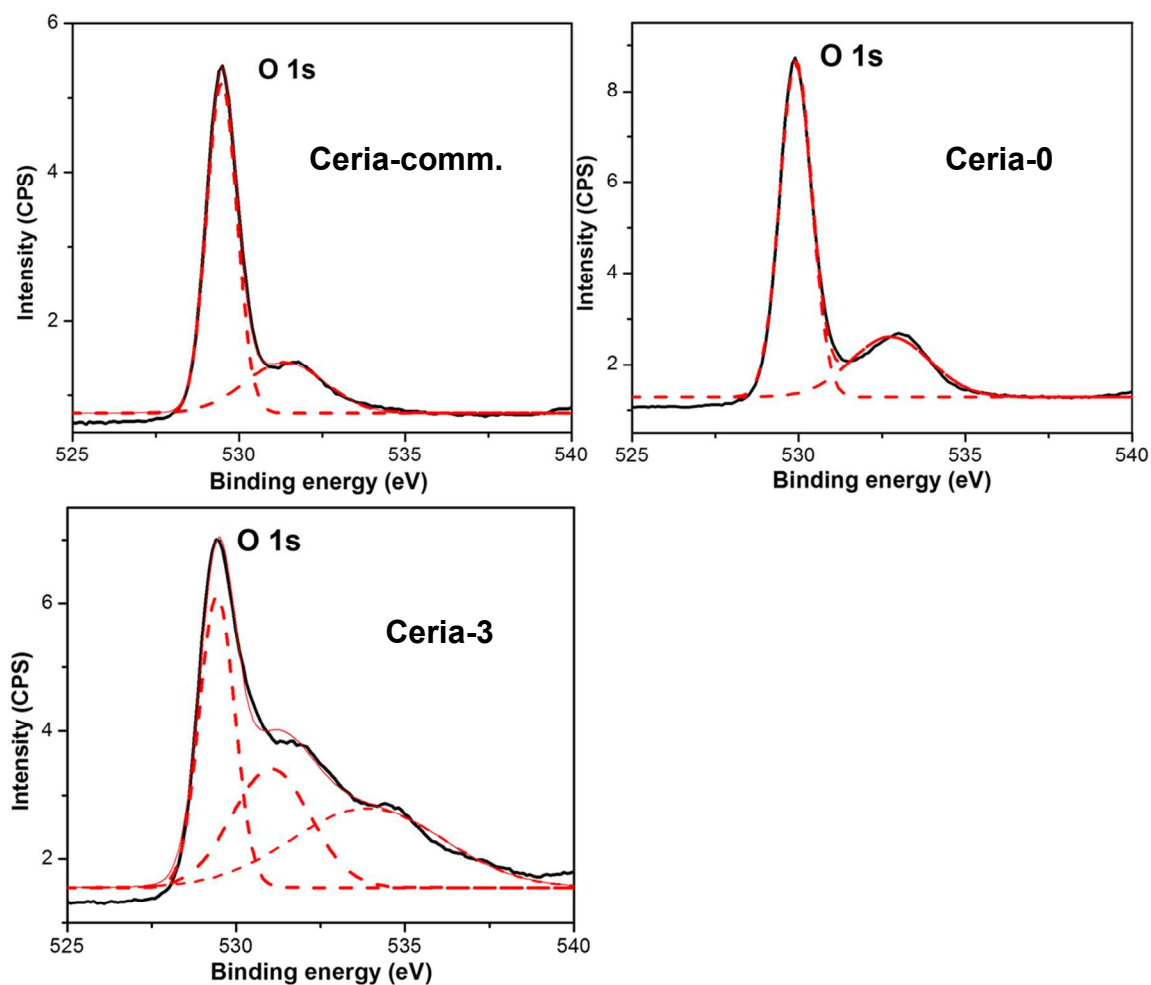

**Figure S6.** XPS of O 1s level of different CeO<sub>2</sub> samples.

**Table S1.** XPS results for the different CeO<sub>2</sub> samples

| Sample                                     | ceria-0 | ceria-2 | ceria-3      | Commercial ceria |
|--------------------------------------------|---------|---------|--------------|------------------|
| Volume of SiO <sub>2</sub> added (ml)      | 0       | 0.5     | 1            | -                |
| Concentration of Ce <sup>3+</sup> ions (%) | 6.1     | 25.8    | 34.9         | 1.3              |
| OH <sup>-</sup> /Total oxygen species (%)  | 20.53   | 38.26   | 39.75(+12.8) | 16.96            |

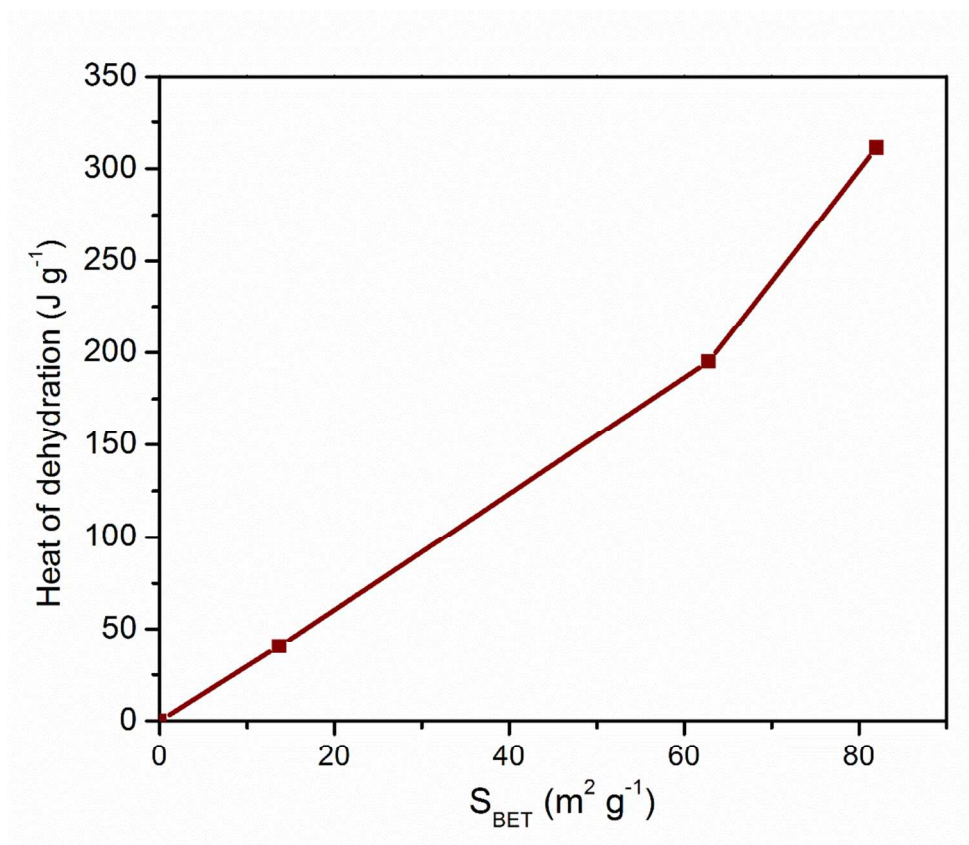

**Figure S7.** Heat of dehydration versus specific surface area of CeO<sub>2</sub>.



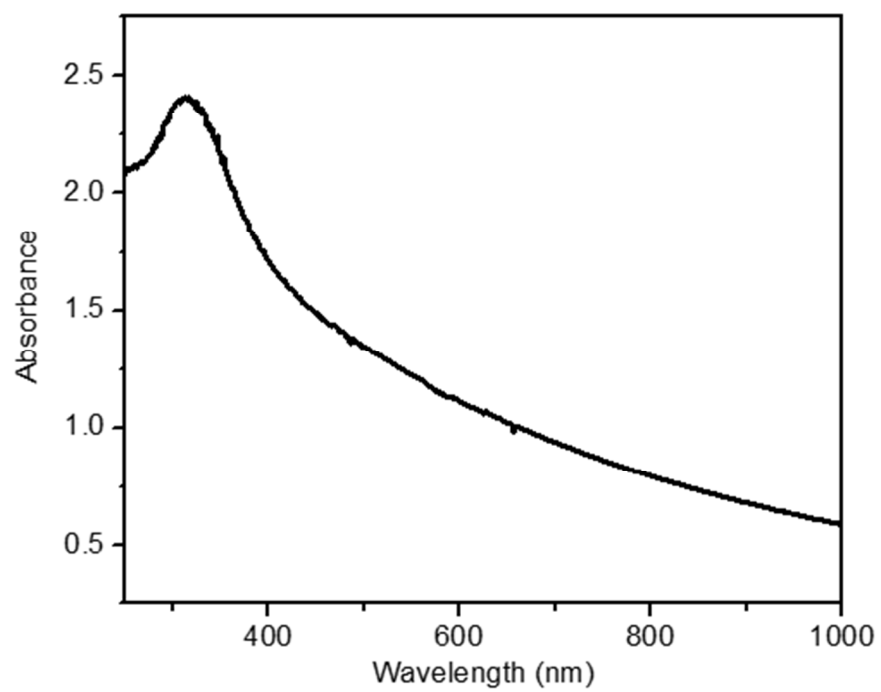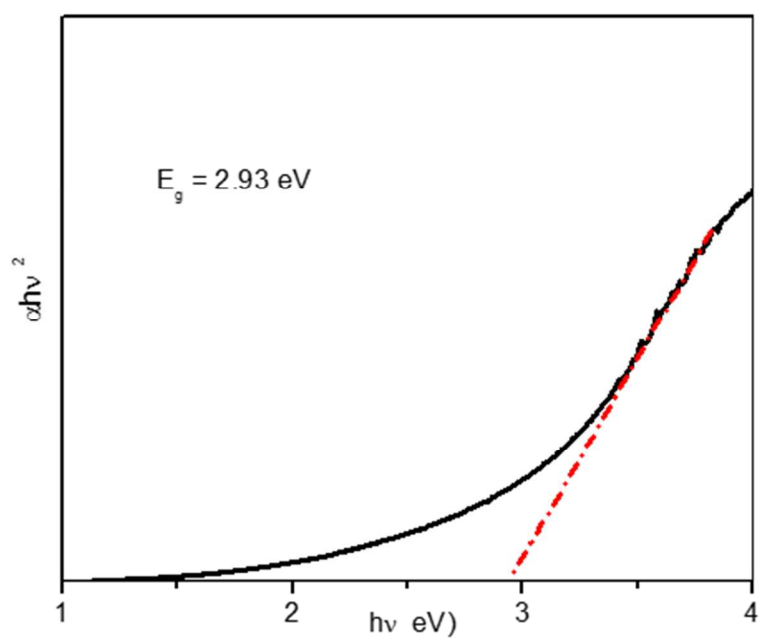

**Figure S8.** UV/vis absorption spectra and the plot of  $(\alpha h\nu)^2$  versus photon energy for ceria-3.

## References

- (1) Wang Z.; Quan Z.; Lin J. Remarkable changes in the optical properties of CeO<sub>2</sub> nanocrystals induced by lanthanide ions doping. *Inorg. Chem.* **2007**, 46, 5237-5242.
- (2) Desphande S.; Patil S.; Kuchibatla S. V. N. T.; Seal S. Size dependency variation in lattice parameter and valency states in nanocrystalline cerium oxide. *Appl. Phys. Lett.* **2005**, 87, 133113-3.
- (3) Paparazzo E. On the curve-fitting of XPS Ce (3d) spectra of cerium oxides. *Mater. Res. Bull.* **2011**, 46, 323-326.
